# Supplementary material for: Virophages, polintons, and transpovirons: a complex evolutionary network of diverse selfish genetic elements with different reproduction strategies
Source: PubMed Central journal article supplement (PMC3671162; doi:10.1186/1743-422x-10-158), 2013-05-23
Supplement: 1743-422X-10-158-S1.pdf [file 1743-422X-10-158-S1.pdf]

## Zn-ribbon domain (ZnR)

```

          *          20          *          40          *
env135528457 : SKAKQKYEENKDYLKKKITICE--CGSVIRITDKAKHEKTKKHIAAYC-----
env136411477 : -----S-----QLIECQ--CGSKIVKYNYKHLKTKKHQNYI-----
env136834482 : -----KEKINEKIDCK--CGKYTHNHQSRHLKSKKHQLYL-----
env136843454 : -----RDEVNKKKREKVICK--CGVSVSKSGLARHRKRGVHQAYL-----
env139737098 : -----RAVNN----FKIECS--CGASVSKPNIARHLKSKKHLDNI-----
env140745199 : -----KEKILEKGKKEKVECP--CGSVVRKDNLPKHKKTQKHQNYL-----
env141683978 : -----REKIKEYRSQIIECE--CGSTIQLQEKARHLKSKKHINFT-----
env142032154 : -----RDKILEKKKQKITICE--CGCEVSKAVIYQHKKTKKHQDLM-----
Phyin301100174 : -----RDRLVE----KVICE--CGGHYQYRGRSYHFKSQKHIRWM-----
Physo348667318 : -----EDSIKARRRQKYQCE--CSCRYSYGCKTTHLNTKKHQRWL-----
Physo348669710 : -----KERLVA----KITICE--CGGHYQYRGRTYHFKSQKHIRWM-----
Physo348690299 : -----KERLVA----KITICE--CGGHYQYRGRTYHFKSQKHIRWM-----
Physo348690372 : -----EDSIKARRRQKYQCE--CGRYSYGCKTALHTKTKKHQRWL-----
Dicfa328871351 : ---MFRKKVLDYKNEKIECE--CGAITSRVNRYRHLKGKIVNNM-----
Mavirus_MV06 : -----KEKLR----KNICEI--CGGSFTHENKSHHLKSKKHQSAL-----
OLV_OLV1_322510447 : -----KEKIKEKVECKYCAKLLSKQYMSRHHTCKSKPKV-----
Sputnik_V14 : -----KPKIKKYYSKKEIECPI--CGALYTRSNTVNHKKSQKHIAKAINNDLESN
Sputnik_V4 : NGRTYGKKPAKAQPTDRLICEFCGKTYTRSNTSTHRTKEVCKAYQ-----
tv_L3_Megco374110339 : -----KPEDKAKPNDKLI--CNICGGYTRANISKHKKTKKHQIFEQMN-----
tv_L5_MouMo374110361 : -----NINEKAKPKDKLICDICE--CGSYTRSNTVSKHNTQKHQIFESMNDKIR
tv_L8_MouMo374110364 : -----KEERKEYYSKQVRCIT--CGAVYARSNTVSNHKKTKKHNDAMDDLEIKY
tv_R5_Megco374110341 : -----PNDKLIKCLICNGSYIRQKKSIEKTKKHCKAL-----
tv_R6_Mimle374110348 : -----PSDKIKCLV--CNKYKRNNAKSKHEKTKTHQRNL-----
tv_R7_MouMo374110363 : -----PNDKLIKCLT--CGSYIRQKNLFMKKLINI--QEH-----
zn_Phagl357289605 : EKWHTMKDEKNAERRVKIQCG--CGSQHSFGGTAKHLRTDLKAWV-----
zn_Phagl357289896 : -----PDKMAVYL--EKIVCD--CGAEVCSKGMKRHLTSIKMEYL-----
          C   Cg           h   h

```

This Zn-ribbon domain is present in **all three virophages** and **all transpovirons**. In Organic Lake virophage OLV1 and Mavirus protein MV06, ZnF is fused to GIY-YIG endonuclease. Closest full-length homologs are found in *Phytophthora infestans* T30-4, *Phytophthora sojae*, *Phaeocystis globosa* virus 12T, *Phaeocystis globosa* virus 14T, and numerous environmental sequences. Multiple paralogs in *Phytophthora*s (possible transposable elements). ‘Stand-alone’ ZnF domain is found in Sputnik V14, V4, *Dictyostelium*, and transpovirons.







# Peptidase (Mavirus mv 19, mv9)

*With Marseillevirus, Lausannevirus and their best blast hits:*

```
Ba_Strsp302534607  DGTFARNITSSRPF-RQNV--RD--DID-PDA--LS--RRR--IDRRPKEEGSDDY-----IRDEF--GDIRGE-VA-ETLPELVIYDEEG-----RIDA--FRYDILGVAH--SVVQDQAE-----RPERREQ
Bb_Dysga333380698  GSGSWIVGSDRFL-RHII--KP--GGQ--IDF--KK--KEV--IYNTGN-----GKKSII--GDIRD--IQ--CVMAEENSGSYLSVVPTQG-----DTLQ--TSTDFIPVITRAIQEQQVITETQKQTIIDKQQCA--DAULR-----
Bb_Flaba163786012  IQVEWITSDRQW-RDII--RE--PYG--INM--MC--QVVDYTRKNNEN-----KTREM--GDIRD--IE--ALLTKVGYTDQGFITK-----DDDGYMS--RYNDI--AL--TRAIQEQQHIERQSNDRITSNKNYEA--LT-----
Bb_Lacsp336173603  VQVAHEVITDRQW-RNTI--EDSNIG--LDF--NTI--RFV--S--FRNNDKT-----NRIEY--GDIRGE--IK--QALQSSGVKSKSIVSE-----DSEGMIS--RYNDI--FSP--KAI--QQCND-----DET--KAENKTLKI-
Bb_Leeb186140522  AQVALSTTSDRPF-EEII--AT--PLG--LDF--NCR--RFV--S--VRKSNAD-----NTKEW--GDIRGE--IQ--CVLADTGYDGGAGLISEDGSEE-----HYLS--FRYDITAP--KRAIQEILTE-----KDKKEIQNLKKQ--EAQDAKYDALK-
Bf_Strpn3553805089  ---MEQKSDRFL-RQNV--TDTAVKALDK--NPR--MVA--DF--IENK-----KHEEI--GDIRGE--AE--TIIVPKTIVSRDFE-----NPDGYLH--DYTA--VPY--KRAIQEILNQ-----KDEK--EK-
Bi_CanKo494967383  TGRIGITTSRPF-RQNV--AN--PDS--SK--FC--REV--VF--FYRPEYDDGT-----HVRQY--GDIRGE--VA--KIYFDLVVFDNQG-----KEYT--FRYQ--FAP--ID--DAM--QKEHAVVAQQSVIASQQKRP--DDE--SQRLARLEE-
Bp_Beba42522290  AVNGTIQTSDFRL-RAEV--QD--SQG--LDF--MA--QKKS--KWKSDQNDFA-----AKTHW--GEMGE--LEA--QVRRSTASAAEVLGLHETNS-----DYEG--FRYSDI--FAP--KAI--QELYL-----KVLGVSDR--DCE--KENQNLKN-
Bp_Limps149925860  QATAFNVSDFRL-RTHV--QVQDTGSV--LSR--EQ--CTYS--EYLANFN-----LGRRI--GDIRGE--IQ--NIFPEAVATRAD-----GMMS--FRYSAG--GAMA--MGV--GQL--SK--QV--KVL--DKT--VAD--GGQR--TV--DDR--VNH--QHTG-
Bp_Synfu116748330  NGQLGIKASSRPF-RTHV--AF--GER--SDS--HC--REV--VF--HYKKEAR-----GLPEY--GDIRGE--VA--VVYFELVTRDPRG-----GVVE--FRYEA--IFL--DNE--LQQ--QRIL--KAQAL--QISA--QAE--R--DAV--LGL--LAELSA-
Bu_Fusva340758357  SSSNVVAYSDIPL-RQNV--KP--TNI--IDI--D--N--VNY--V--NNKDT-----KKEDI--GDIRGE--VE--CVFPELVIEIDDFVKG-----RIGK--FDYGR--ATV--S--Q--KREILKQ-----EIT--QKA-
env134682211  NGEIYYQTSRPF-RQNV--AD--EFD--TSM--Y--N--REV--S--DDNET-----GERCF--GDIRGE--TFE--CIPEAVVTRDIDGET-----VFDG--FRYSM--SVL--D--SE--R--KRLKVA-----ENDS--KA-
env135131278  SGQFYRSTSDRPF-RTHV--QDATYG--IAB--MC--REV--VF--KGSSES-----DGEVIIG--DIRGE--VHDAGLTFEVQYDEEG-----RFDG--FRYSAN--VSI--C--KAI--QELKA-----ENDS--KA-
env135336521  ---LITETAKRPF-RQNV--AS--DSQ--VEN--SK--NEV--T--DNKEN-----KKSDDI--GDIRGE--VK--EYVFDLVSEEDG-----EVKG--FRYTK--TAV--KAI--QEQQK-----Q--DDE--KE-
env135485176  ---TINSDEPL-RQNV--KP--THG--LEF--NKR--NEV--S--DKMKVSDFLSNKPE---KELKFEIG--DIRGE--VK--EISELDFDNRIVTV-----GENGIHR--VYQ--KMM--E--KRAIQEQQE-----M--ES--RE-
env135926682  -DITAFKSDIPL-RQNV--SP--TKA--LEK--K--S--SGN--V--TKKSD-----GSSHT--GDIRGE--TEALGIPFGITTT-----RSGGYLA--DYDR--V--D--KRAIQEILSA-----K--D--TEN-
env136458611  ---LITETALRPF-RQNV--QD--ED--TSK--M--C--REV--S--DNKES-----KKHDI--GDIRGE--VA--EILPELVETNG-----DITG--FRYTK--TAV--D--KTV--QEQNA-----R--EK--ET-
env136490267  ---LVEITRPL-RQNV--ET--EDG--SSI--DS--T--FV--S--TKKES-----KEEDF--GDIRGE--VA--DIAFPHVSRDEGD-----NFTG--FRYSK--SVL--D--LVV--QRCST-----L--ED--NE-
env136497817  TVTSLVETTRPL-RQNV--ET--EDQ--SSI--DS--QV--V--S--TKKES-----KEEDF--GDIRGE--VA--EIAFPHVSRDEGD-----NFTG--FRYSK--SVL--D--LVV--QRCST-----L--ED--NE-
env139932888  QVNSISALSDRFL-RQNV--EDSEYG--LNI--EN--K--EVT--EWD--QRDGNRK-----GIKDV--GDIRD--IQ--EVDDEYTRIVHESNF-----DRLE--ATYGR--IPD--KAV--QDLSA-----K--K--EN-
env139956417  VEGTLITETAKRPF-RQNV--QF--ESQ--TEN--ER--N--FV--S--EKRRD-----GKSDI--GDIRGE--VK--EITPVLVSEEDG-----EVKE--FRYTK--TAV--D--KRAV--QEQQK-----Q--N--RE-
env140097408  ---GDDEPL-RQNV--QN--ENG--LS--IEG--C--REV--S--V--N--NEMGR-----KGNDF--GDIRGE--VE--KIIPELISEIDLLIFQD-----NEQTYKT--SYER--V--P--D--G--S--KREIND-----K--K--EK--K-
env140217298  ---GTISSIDRPF-RQNV--IS--TDG--LDI--D--C--REV--VF--K--YNTTIDEEGRHDFGYKN--DKVRY--GDIRGE--VE--KIFQYVETSTRRKINNEVD-----DFKS--LSTTR--V--F--M--KAI--QELSA-----R--K--T--EG-
env141270599  ---QTISSIDARD-RQNV--VD--FTG--LDF--ND--REV--K--K--QTRDNGKGD---GKSISA--GDIRD--IQ--KIQKSSAAEFLNLVMNNEF-----DRLE--AREGQ--IPV--KAI--QELSA-----KNDA--EA-
MV09 326439157  LEVSGEVKQDLELNQNV--LS--DKG--LKE--N--KAV--K--KODE-----GNCHY--GDIRGE--VE--KISKLAGVNVVIV-----KENN--HLSDN--IFL--D--K--S--K--S--K-----R--D--V--EK--G--F--S--W--ND-
MV19 326439167  SANGTIQTSDLNR-RQNV--ND--TRG--LDF--NTI--RFV--S--K--FKRENTS---DRVHY--GDIRGE--VE--TVFNNIGSDLTGNATVIKSQKMIPODFNPFIPQSDGTGIQKTFIEGEGFDYS--RYTEFIAP--D--KRAV--QELTA-----QNA--VA-
fo_Cyano372217709  ASNGSINTGKRNQ-RNTI--VESDLG--LSE--NKR--KEV--S--K--K--NNK-----TRTHY--GDIRD--VE--TILSDIKRPTSGFAGIKEDIPDQLYVEDDDIPEGKVKVDVKTAAFTIYG--FRYHEFIS--P--D--KRAV--QELST-----D--ET--KT-
f1_Proph61806169  CNDTSSSDLEPL-RQNV--QNFDFHG--IAW--K--K--REV--V--M--K--R--R--S--W--Y--T--E--D--F--A--K--G--T--P--G--S--K--K--T--N--R--I--H--V--G--D--E--A--E--V--E--K--K--F--G--Y--G--K--K--N--L--I--T--I--N--Q--D--E--D--D--A--D--P--S--Y--G-----K--Y--E--R--I--P--V--N--A--K--R--E--L--S--S-----D--D--T--KA-
q1_Parbu155122212  VAGSWLATDRFL-RTHV--QNVAN--SR--EEL--RN--L--K--H--D--NT--DAVE---GEDRSQI--GDIRGE--LE--EY--F--K--S--V--K--T--E--M-----DAD--PSYG-----G--I--E--C--K--V--D--V--T--Q--N--M--A--Y--G--A--K--K--C--I--Q-----R--D--E--EA-
q1_Parbu340025889  GGGTWSVPSDMRFL-RNST--IMAN--HNC--VEV--R--C--DLK--K--SLN--DEV--S--TRIT--DKNVV--GDIRD--VE--KYIPKAVSVRMY-----GLTDGKV--DAD--QV--K--T--Y--G--A--R--K--W--S--V-----R--D--E--ET-
vi_uncph291335991  IRVDWIVTSDRFL-RQNV--QD--ITG--LDF--NCR--K--K--E--S--W--F--K--R--D--R--T--N--V--K--H--GDKRL--GDIRGE--DIALLEGSDPVIIDNNDI-----DNLK--YRGER--V--P--D--KRAIQEILSA-----K--T--E--AG-
ze_Lausa327409559  TGIITQAASRPF-RQNV--RD--EVD--TER--YD--SLK--A--NNK--KSD-----GTEDY--GDIRD--TY--DVLPELVILDAEG-----KPHG--FRHT--V--M--L--D--E--V--Q--L--N--L--K-----K--Q--C--Q-
ze_Lausa327409568  TGLITQAASRPF-RQNV--REAGEE--WPS--ASAKVCD--DID-----GRTDH--GDIRD--VF--EYFQCSKSGVNG-----KRTL--P--I--M--A--L--D--E--V--Q--L--K-----D--A--Q--K--R--S-
ze_Lausa327409569  TGVIITQAASRPF-RQNV--RN--EVD--TER--HC--SLK--T--NNK--KED-----KKEDY--GDIRGE--AY--EILPELVILDAEG-----KPHG--FRHT--V--M--L--D--E--V--Q--L--R-----D--R--E--H-
ze_Lausa327409571  TGVITQAASRPF-EEII--QD--EVD--TSK--HD--SLK--T--RYKTD-----GKKDY--GDIRD--TF--EILPELVILDAEG-----KPHG--FRHT--V--M--L--D--E--V--Q--L--R-----D--R--E--R-
ze_Lausa327409971  TGLVTQAASRPF-RQNV--RE--EFP--F--PS--L--E--T--R--V--C--D--D--ID--DGKDH--GDIRGE--VF--EYASFDIEG-----QRNG--FRS--R--I--M--Y--D--E--V--Q--L--R--A--K-----D--E--G--K--Q-
ze_Lausa327409972  TGIITQAASRPF-RQNV--RD--EVD--PRM--HD--SLK--A--NNK--KED-----GKGDH--GDIRGE--AF--EVLPELVILDAEG-----KPHG--FRHT--V--M--L--D--E--V--Q--L--R-----D--R--E--R-
ze_Marse284504065  TGLITQAASRPF-RQNV--RE--EFD--F--P--S--E--M--K--V--C--A--E--I--D-----GKTRD--GDIRD--TF--EYFQCSKSGVNG-----FRNG--V--I--F--A--R--F--I--M--A--L--D--E--V--Q--L--K-----D--V--T--A--Q--R-
ze_Marse284504066  TGIITQAASRPF-RQNV--RD--DVD--TER--YD--SLK--A--NNK--KSD-----GREDF--GDIRD--TY--DVLPELVILDAEG-----NPHG--FRHT--V--M--L--D--E--V--Q--L--K-----Q--K--E--Q-
ze_Marse284504079  ze_Marse284504080  ze_Marse284504080  TGIITQAASRPF-RQNV--RD--EVD--TSK--YD--ALR--T--NNK--KSD-----GRTDH--GDIRGE--VF--EYFATFDERG-----DRNG--ANVIL--F--A--V--A--L--S--E--V--Q--L--K-----Q--K--T--R--K--Q--R--G--I-
ze_Marse284504099  TGIITQAASRPF-RQNV--RD--EVD--TRA--HD--PKM--T--NNK--KED-----GKGDH--GDIRGE--AY--DILPELVILDAEG-----KPHG--FRHT--V--M--L--D--E--V--Q--L--R-----D--R--E--R
```

## M19 N-terminal

```

*          20          *          40          *          60          *          80
MV19_32643 : ---MSISNLYGNSYKITCAG--LDAGKNKITNV--APPVDDYDCPNKAYVDSQIDSHSGTLSQVLAAGNDGNGDDMINIGEIQANTLS : 82
Polinton-1 : QTSSSACLKLDGTN---SMSANINLNSHKLIINV-VPTNAQDAATKNYVDRLIPYQHKY--KVLIIAGQSNTYAGREWGLSQSITNV : 81
E1_Triad19 : HNEVIKVRGDKGNGYKINDDGDYDLESKRITNLSNVVDDSDATNKQYVDSRIDTKVSK--SGDVLYGNLDMNKNKCIKNLHDIDPND : 85
E1_Trica27 : LSASNAFFKSTPSPFVFTADGDLDLKHHRICNI--NSTEDKDCANKVYIDLVSQIYQK----- : 58
f2_Salph32 : MHVAEEARDLTADNLGVNNDGDLDARGRRIVNVKDP-TLPQDAATKNYVDLVSGGEGSAGKALEELAKPNGAYKIGLGDSTVGDIIIG : 86
f2_Vibph32 : LHVAEEARDLAGDSIAVDDNGDLDARGRKIVNLAEDAEDTDAVNNGYGMKKKFDNSTFNNAQKAEASANAANKSENKAKDSELSIEA : 86
f2_Yerph19 : IHVAEEARDLTADTIGVNNDGNLDARGRRIVNVAFATSDYDAVPLKQITDRESSVWNAVTKASEQADRSNKEANRSRDEADRARE : 86
f2_Salph18 : LHVAEEARDLTADTIGVNNDGNLDARGRRIVNVADGVTGDGDAISVGQVKRMNQNSWQARNESLQFRNEAEGFRNQASTSKQAAATS : 86
f2_Entph21 : MHVAEEARNLTDTIGVNNDGHLDARGRRIVNLANAVDDRDAVSEFGQKTMNQNSWQARNETLQFRNEAETFRNQAEQFKDESSIN : 86
          1          g 1          46 N6          d Da          6

```

*With more polyntons:*

```

*          20          *          40          *          60          *          80
Polinton-3 : IHDFNQ-----ILNKKLDTIGNDVSEIKKSIIELYDKIKV--IEFFINENSSTTTTTTRAH----- : 55
Polinton-7 : LEGSQQVSRGPPGIGFNFTSDGDFDLEXKRILCNIGEP-RXPNDAITLHSLKVLILQTEXNYIASKLXGIGEVIEEYKQQVEKHQLEV--- : 85
Polinton-6 : LKKNEG-DRGPPGFYFKITKDGQYLDNKRILCNVAAP-HKLNEAVDLGTLHTIHQMEHKKVRDVTDKLREELKDLDSLIEAHRDEM--- : 84
Polinton-4 : SNRSKG-RRGPPGVGYKITADGHFDIGSRRLCNVAEP-LELNDAVNLAVLQRSINSEIRSVEITSDLRQSIDAVELAVQIAKDEN--- : 84
Polinton-1 : QTSSSA-CLKLDGTN---SMSANINLNSHKLIINVVDP-TNAQDAATKNYVDRLIPYQHKYKVLIIAGQSNTYAGREWGLSQSITNV--- : 81
E1_Triad19 : HNEVIK-VRGLKNGYKINDDGDYDLESKRITNLSNVVDDSDATNKQYVDSRIDTKVSKSGDVLYGNLDMNKNKCIKNLHDIDPND--- : 85
MV19_32643 : MSISNL----LYGNSYKITCAG--LDAGKNKITNVAPP-VDDYDCPNKAYVDSQIDSHSGTLSQVLAAGNDGNGDDMINIGEIQANTLS- : 82
E1_Trica27 : LSASNA-FFKSTPSPFVFTADGDLDLKHHRICNINDS-TEDKDCANKVYIDLVSQIYQK----- : 58
f2_Salph32 : MHVAEE-ARDLTADNLGVNNDGDLDARGRRIVNVKDP-TLPQDAATKNYVDLVSGGE--GSAGKALEELAKPNGAYKIGLGDSTVGDIIIG : 86
f2_Vibph32 : LHVAEE-ARDLAGDSIAVDDNGDLDARGRKIVNLAEDAEDTDAVNNGYGMKKKFDNSTFNNAQKAEASANAANKSENKAKDSELSIEA : 86
f2_Salph18 : LHVAEE-ARDLTADTIGVNNDGNLDARGRRIVNVADG-VTDGDAISVGQVKRMNQNSWQARNESLQFRNEAEGFRNQASTSKQAAATS- : 86
f2_Entph21 : MHVAEE-ARNLTDTIGVNNDGHLDARGRRIVNLANAVDDRDAVSEFGQKTMNQNSWQARNETLQFRNEAETFRNQAEQFKDESSIN- : 86
f2_Yerph19 : IHVAEE-ARDLTADTIGVNNDGNLDARGRKIVNLAFA-TSDYDAVPLKQITDRESSVWNAVTKASEQADRSNKEANRSRDEADRARE- : 86
          g 1          6 n6          da          6

```
