# Supplementary material for: Virophages, polintons, and transpovirons: a complex evolutionary network of diverse selfish genetic elements with different reproduction strategies
Source: PubMed Central journal article supplement (PMC3671162; doi:10.1186/1743-422x-10-158), 2013-05-23

## Primase-helicase (S3H) topology testing

| tree     | elw   | au    | Likelihood | tree         | constraint description                                                | elw   | au    | Likelihood |
|----------|-------|-------|------------|--------------|-----------------------------------------------------------------------|-------|-------|------------|
| freetree | 1.000 | 0.870 | -66820.76  | constraint 0 | all three virophages with related sequences are monophyletic          | 0.000 | 0.000 | -66909.7   |
| freetree | 1.000 | 0.852 | -66820.76  | constraint 1 | all three virophages with related sequences are monophyletic          | 0.000 | 0.000 | -66904.75  |
| freetree | 0.991 | 0.994 | -66820.76  | constraint 2 | OLV and Sputnik with their related env sequences are monophyletic     | 0.009 | 0.006 | -66885.34  |
| freetree | 0.995 | 0.995 | -66820.76  | constraint 3 | OLV and Mavirus with their related env sequences are monophyletic     | 0.005 | 0.000 | -66891.99  |
| freetree | 0.760 | 0.756 | -66820.76  | constraint 4 | Sputnik and Mavirus with their related env sequences are monophyletic | 0.240 | 0.244 | -66832.73  |

Only the monophyly of Mavirus and Sputnik was not rejected (AU > 0.05)

# Constraint 0

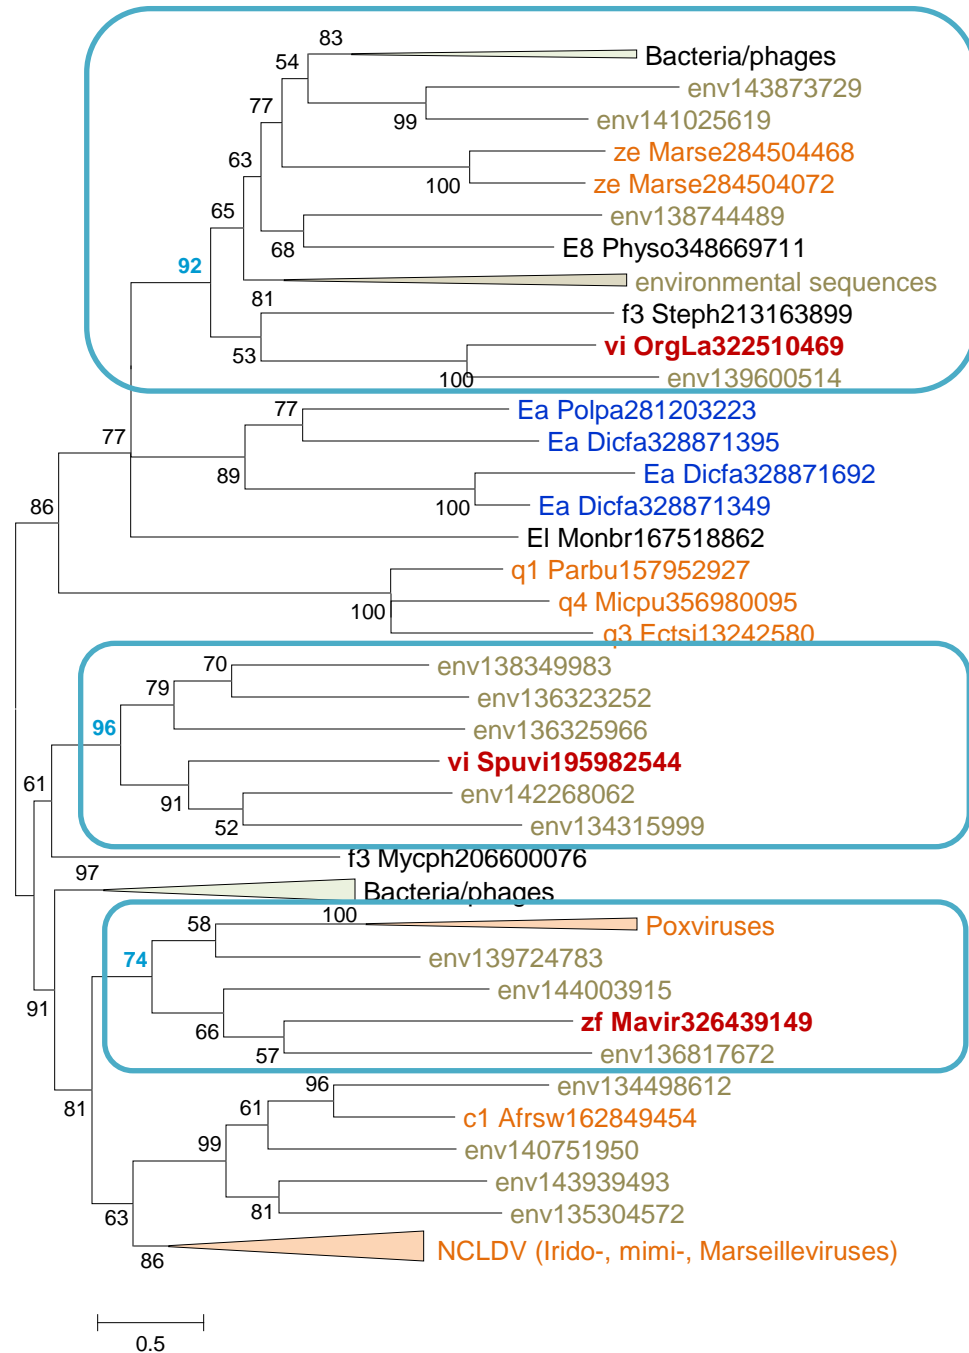

# Constraint 1

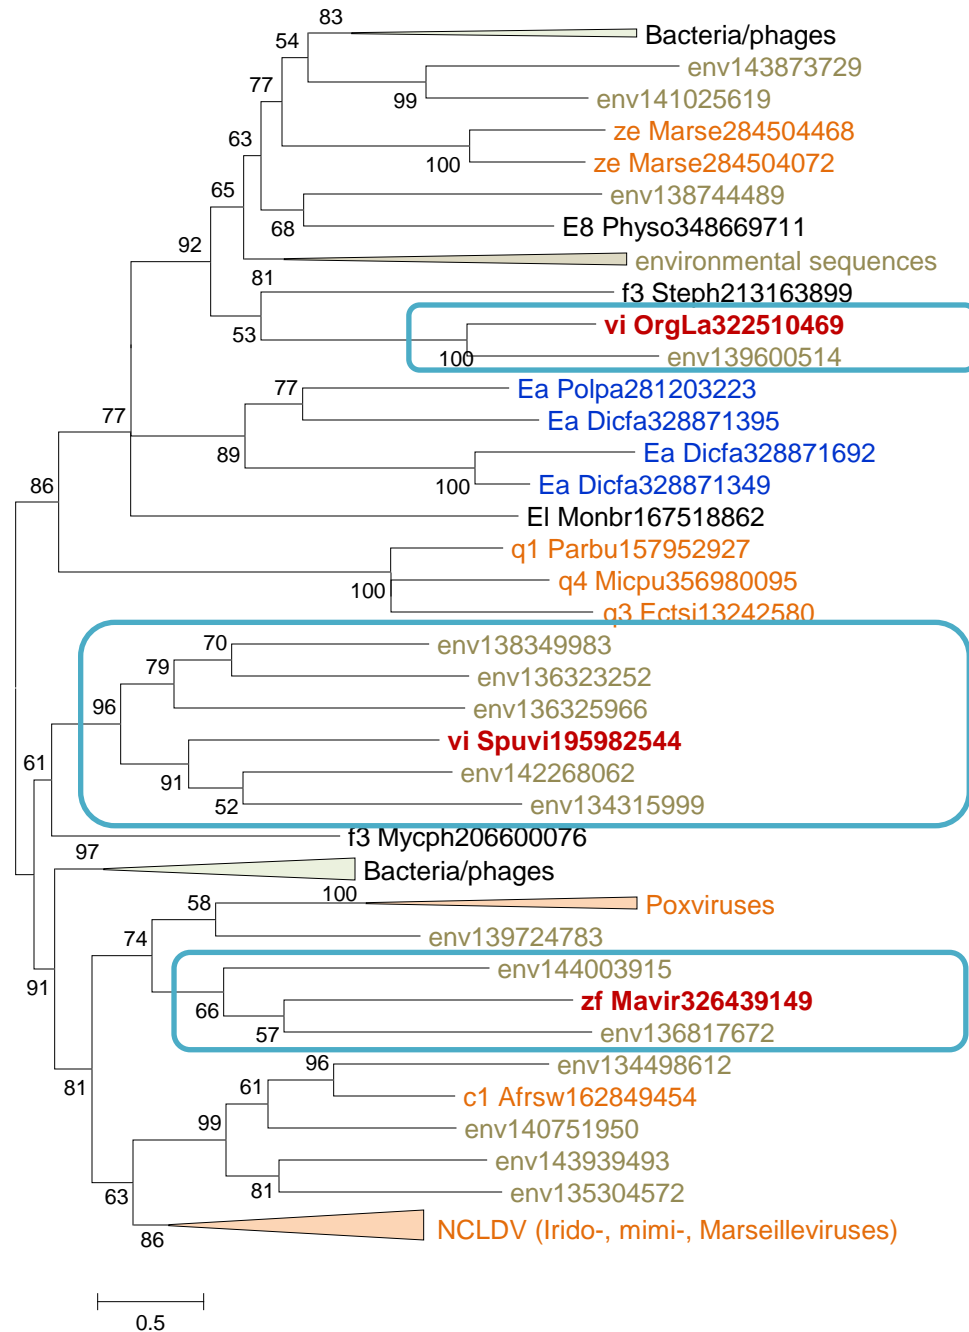

# Constraint 2

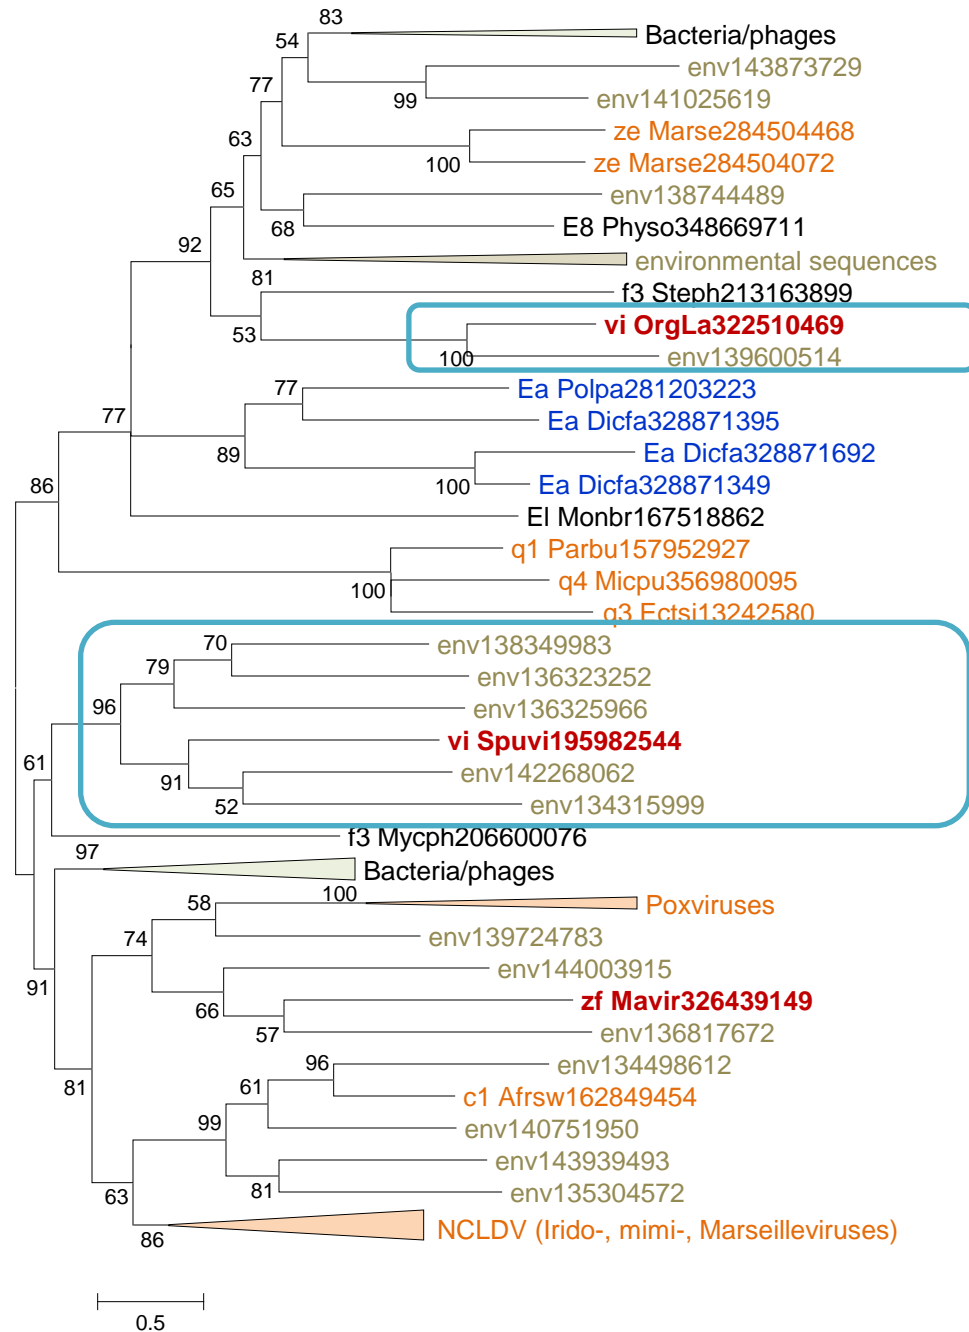

# Constraint 3

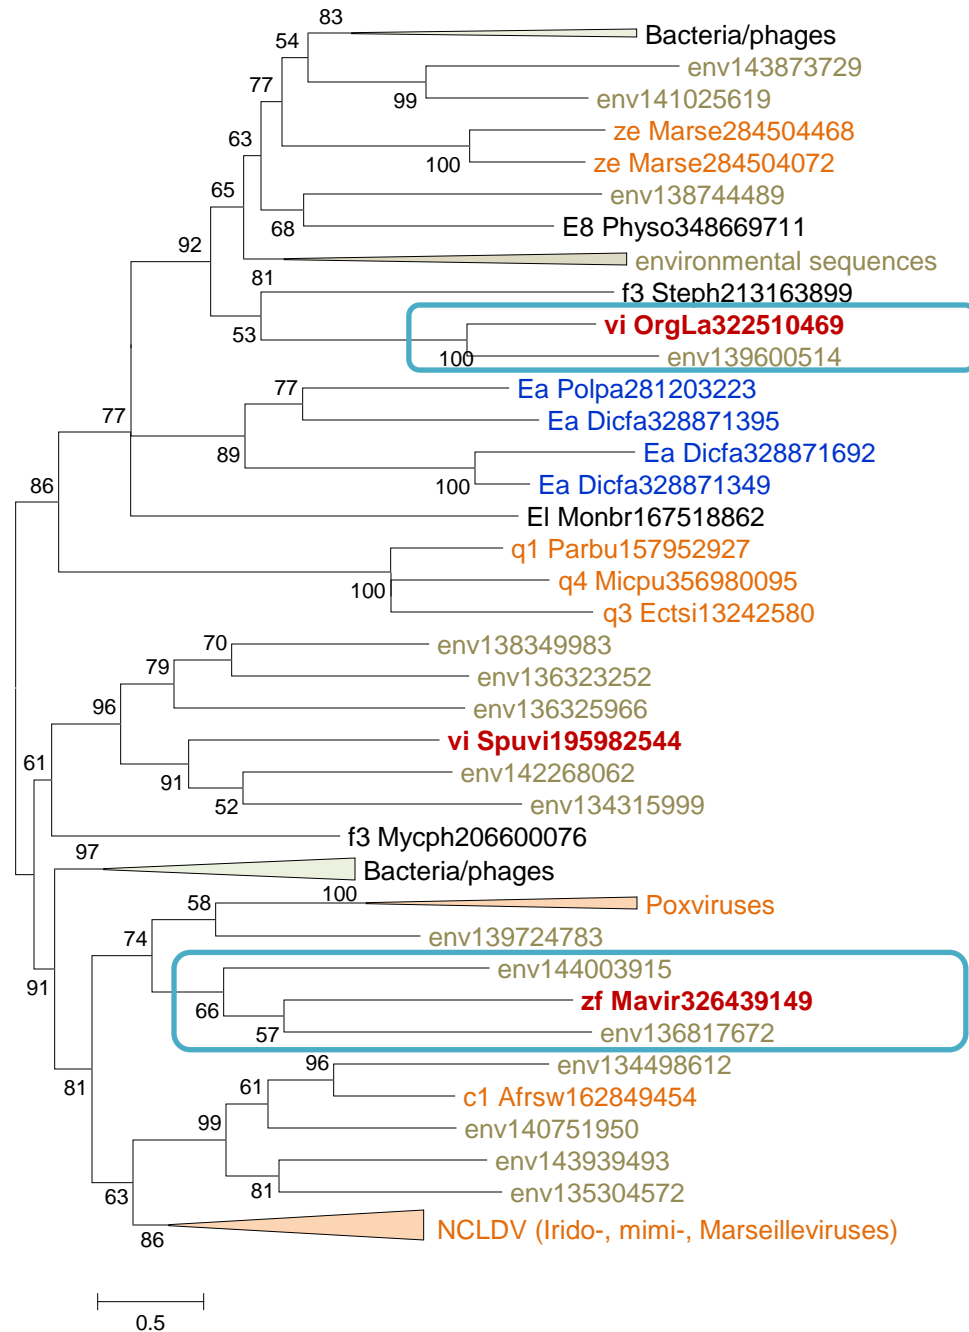

# Constraint 4

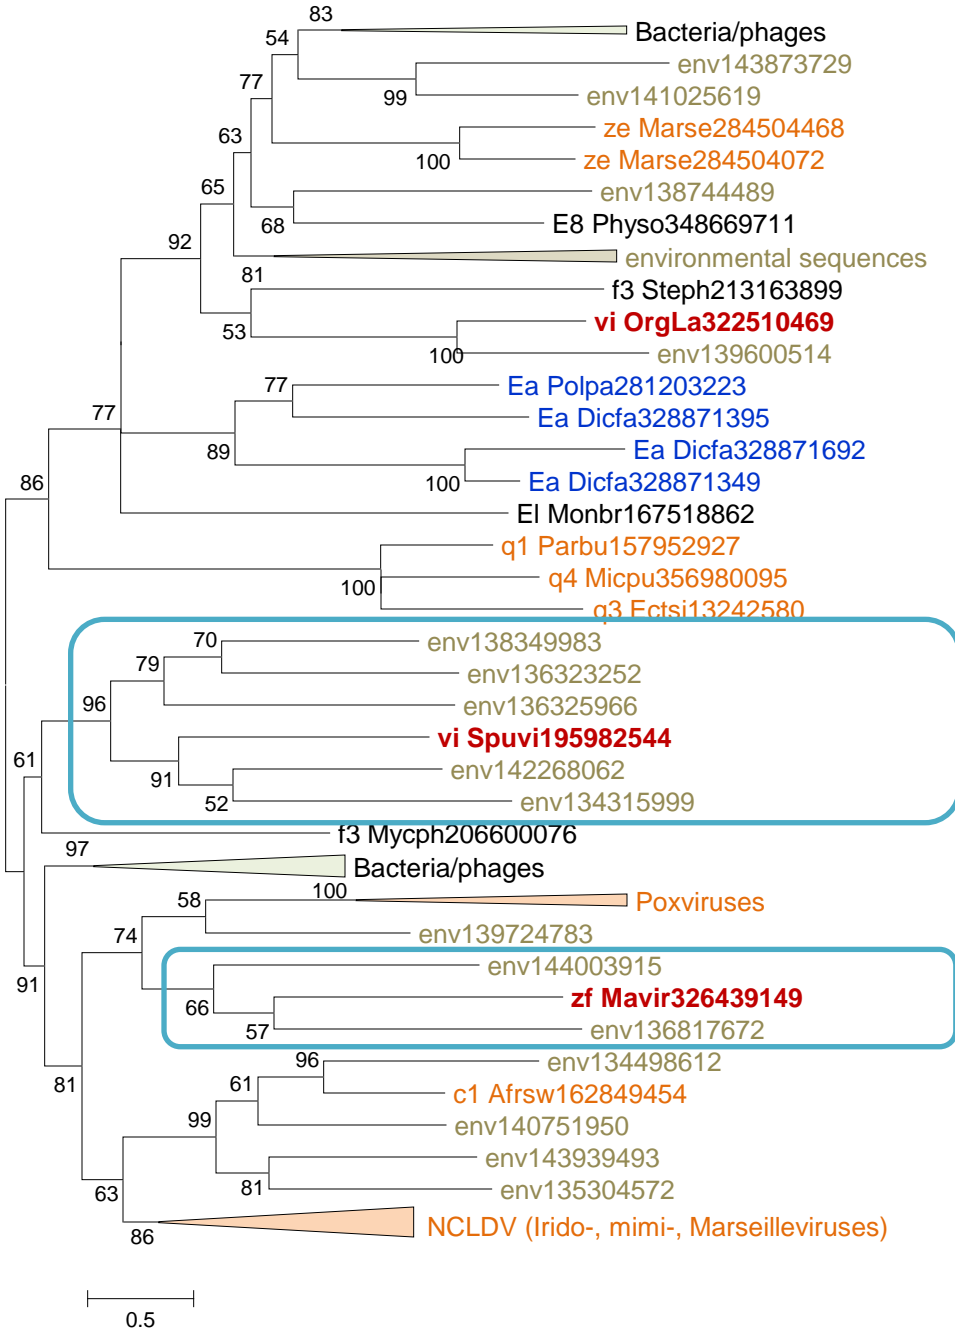

Supplement: 1743-422X-10-158-S2.pdf [file 1743-422X-10-158-S2.pdf]
